# Supplementary material
Source: PubMed Central journal article supplement (PMC3792471)
Supplement: NIHMS54745-supplement-supporting_info.pdf [file NIHMS54745-supplement-supporting_info.pdf]

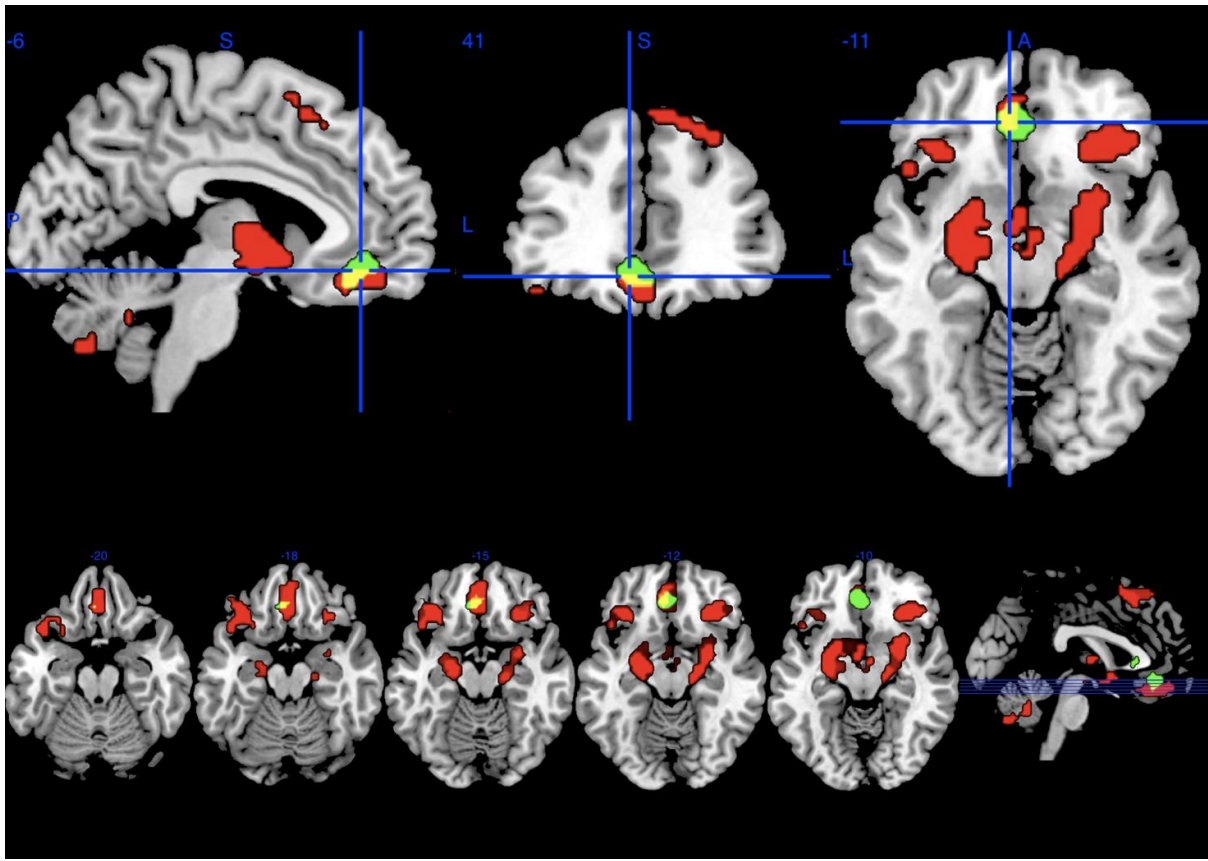

### Supporting Information

**Figure S1.** Superimposed functional maps to show the overlap zones within the medial orbito-frontal cortex (mOFC) activated by our previous study [Ishizu and Zeki 2011] of the experience of beauty (green) and the current judgment study (red). The overlap between the two activations is shown in yellow (-6 41 -11).
